# Supplementary material for: Combinatorial optimization with physics-inspired graph neural networks
Source: Springer Nature journal article supplement (doi:10.1038/s42256-022-00468-6), 2022-04-21
Supplement: 42256_2022_468_MOESM1_ESM.pdf [file 42256_2022_468_MOESM1_ESM.pdf]

**Supplementary information**

---

**Combinatorial optimization with physics-inspired graph neural networks**

---

In the format provided by the authors and unedited

# Supplemental Material for: Combinatorial Optimization with Physics-Inspired Graph Neural Networks

Martin J. A. Schuetz,<sup>1,2,3</sup> J. Kyle Brubaker,<sup>2</sup> and Helmut G. Katzgraber<sup>1,2,3</sup>

<sup>1</sup>Amazon Quantum Solutions Lab, Seattle, Washington 98170, USA

<sup>2</sup>AWS Intelligent and Advanced Compute Technologies, Professional Services, Seattle, Washington 98170, USA

<sup>3</sup>AWS Center for Quantum Computing, Pasadena, CA 91125, USA

## I. CORE GCN CODE BLOCK

Listing 1. Core code block of example script based on the DGL library. The first block defines a two-layer GCN architecture Ansatz; the second code block defines the loss function as described by Eq. (6). Further details can be found in the main text, as well as in Ref. [S117].

---

```
# Import required packages
import dgl
import torch
import torch.nn as nn
from dgl.nn.pytorch import GraphConv

# Define two-layer GCN
class GCN(nn.Module):
    def __init__(self, in_feats, hidden, classes):
        super(GCN, self).__init__()
        self.conv1 = GraphConv(in_feats, hidden)
        self.conv2 = GraphConv(hidden, classes)

    def forward(self, g, inputs):
        h = self.conv1(g, inputs)
        h = torch.relu(h)
        h = self.conv2(g, h)
        # binary classification
        h = torch.sigmoid(h)
        return h

# Define custom loss function for QUBOs
def loss_func(probs_, Q_mat):
    """
    function to compute cost value for given
    soft assignments and predefined QUBO matrix
    """
    # minimize cost = x.T * Q * x
    cost = (probs_.T @ Q_mat @ probs_).squeeze()

    return cost
```

---

## II. HYPERPARAMETERS FOR G-SET EXPERIMENTS

In this section, we provide details for the specific model configurations (hyperparameters) as used to solve the Gset instances with our physics-inspired GNN solver (PI-GNN). The results achieved with these model configurations are displayed in Tab. I; the corresponding hyperparameters are given in Tab. II. Our base GCN architecture with tunable number of layers  $K$  is specified in Listing 2.

| graph | PI-GNN | embedding $d_0$ | layers $K$ | hidden dim $d_1$ | hidden dim $d_2$ | hidden dim $d_3$ | learning rate $\beta$ | dropout |
|-------|--------|-----------------|------------|------------------|------------------|------------------|-----------------------|---------|
| G14   | 3026   | 369             | 1          | 5                | —                | —                | 0.00467               | 0.0     |
| G15   | 2990   | 394             | 1          | 5                | —                | —                | 0.00587               | 0.0     |
| G22   | 13181  | 419             | 2          | 1909             | 3401             | —                | 0.00103               | 0.4498  |
| G49   | 5918   | 2167            | 3          | 2338             | 1955             | 8                | 0.00058               | 0.3554  |
| G50   | 5820   | 208             | 3          | 218              | 3582             | 566              | 0.00488               | 0.2365  |
| G55   | 10138  | 278             | 3          | 8412             | 8352             | 5499             | 0.00161               | 0.1062  |
| G70   | 9421   | 109             | 3          | 1233             | 7048             | 11869            | 0.00139               | 0.3912  |

TABLE II. Numerical results for MaxCut on Gset instances, with hyperparameters specified for the PI-GNN solver.

Listing 2. Base GCN architecture used for solving MaxCut on Gset problem instances.

```

# Define GNN object
class GCN_dev(nn.Module):
    def __init__(self, in_feats, hidden_sizes, dropout, num_classes):
        super(GCN_dev, self).__init__()
        # Combine all layer sizes into a single list
        all_layers = [in_feats] + hidden_sizes + [num_classes]
        # slice list into sub-lists of length 2
        self.layer_sizes = list(window(all_layers))
        # reference to ID final layer
        self.out_layer_id = len(self.layer_sizes) - 1
        self.dropout_frac = dropout
        self.layers = OrderedDict()
        for idx, (layer_in, layer_out) in enumerate(self.layer_sizes):
            self.layers[idx] = GraphConv(layer_in, layer_out).to(DEVICE)
    def forward(self, g, inputs):
        for k, layer in self.layers.items():
            if k == 0: # reference to ID final layer
                h = layer(g, inputs)
                h = torch.relu(h)
                h = F.dropout(h, p=self.dropout_frac)
            elif 0 < k < self.out_layer_id: # intermediate layers
                h = layer(g, h)
                h = torch.relu(h)
                h = F.dropout(h, p=self.dropout_frac)
            else: # output layer
                h = layer(g, h)
                h = torch.sigmoid(h) # binary classification
        return h

```
